# Supplementary material for: Blocking GRP/GRP-R signaling decreases expression of androgen receptor splice variants and inhibits tumor growth in castration-resistant prostate cancer
Source: PubMed Central journal article supplement — Transl Oncol. 2021 Aug 27;14(11):101213. doi: 10.1016/j.tranon.2021.101213 (PMC8405941; doi:10.1016/j.tranon.2021.101213), 2021-08-27
Supplement: mmc1.pdf [file mmc1.pdf]

## Online Peer Review Report (facilitated via Quantum)

TRANON D-21-00744

<https://quantum.elsevier.com/journals/translational-oncology/manuscripts/ckpzf7is600003h5yfrvl81wh>
